# Supplementary material for: Fungal Lignocellulose Utilisation Strategies from a Bioenergetic Perspective: Quantification of Related Functional Traits Using Biocalorimetry
Source: MDPI journal article supplement (doi:10.3390/microorganisms10081675), 2022-08-19
Supplement: s1 [file s1]

## **Supplementary Material**

# **Fungal Lignocellulose Utilisation Strategies from a Bioenergetic Perspective: Quantification of Related Functional Traits Using Biocalorimetry**

Hieu Linh Duong <sup>1,2</sup>, Sven Paufler <sup>1</sup>, Hauke Harms <sup>1</sup>, Dietmar Schlosser <sup>1,\*</sup>, and Thomas Maskow <sup>1,+</sup>

<sup>1</sup> Department of Environmental Microbiology, Helmholtz-Centre for Environmental Research - UFZ, Permoserstraße 15, 04318 Leipzig, Germany

<sup>2</sup> Vietnamese-German University (VGU), Le Lai Street, Hoa Phu Ward, Thu Dau Mot City, Binh Duong Province, Vietnam

## **Content**

|               |   |
|---------------|---|
| Table S1..... | 2 |
| Table S2..... | 4 |

\* Correspondence: thomas.maskow@ufz.de (T.M.); dietmar.schlosser@ufz.de (D.S.)

**Table S1.** Total dry masses, substrate dry mass losses, total lignin contents, and lignin losses of fungal wheat straw cultures. Means and standard deviations (SD) from triplicate cultures are shown, respectively. Substrate dry masses were calculated as differences between total dry masses (Table S1) and fungal biomasses (Table S2), respectively (data not shown). Mass losses were always calculated as the difference between the corresponding initial and final amount, respectively, and are expressed in terms of absolute (mg) and relative (i.e. in relation to the corresponding initial amount) values, respectively.

| Fungal strain                                              | Total dry mass (mg) |       | Substrate dry mass loss (mg) |                 | Substrate dry mass loss (%) |                 | Total lignin (mg) |       | Lignin loss (mg) |                 | Lignin loss (%) |                 |
|------------------------------------------------------------|---------------------|-------|------------------------------|-----------------|-----------------------------|-----------------|-------------------|-------|------------------|-----------------|-----------------|-----------------|
|                                                            | Mean                | SD    | Mean                         | SD <sup>a</sup> | Mean                        | SD <sup>a</sup> | Mean              | SD    | Mean             | SD <sup>a</sup> | Mean            | SD <sup>a</sup> |
| Initial value <sup>b</sup>                                 | 558.29              | 47.83 | NA <sup>c</sup>              |                 | NA <sup>c</sup>             |                 | 74.00             | 6.32  | NA <sup>c</sup>  |                 | NA <sup>c</sup> |                 |
| <i>S. commune</i> DSM 11223 <sup>d</sup>                   | 484.34              | 13.68 | 91.89                        | 49.77           | 16.55                       | 9.08            | 75.78             | 1.90  | ND <sup>e</sup>  |                 | ND <sup>e</sup> |                 |
| <i>G. butleri</i> DSM 2917 <sup>d</sup>                    | 555.17              | 34.67 | 18.03                        | 59.13           | 3.25                        | 10.65           | 77.36             | 4.39  | ND <sup>e</sup>  |                 | ND <sup>e</sup> |                 |
| Initial value <sup>f</sup>                                 | 561.06              | 20.84 | NA <sup>c</sup>              |                 | NA <sup>c</sup>             |                 | 74.46             | 2.75  | NA <sup>c</sup>  |                 | NA <sup>c</sup> |                 |
| <i>G. trabeum</i> DSM 1398 <sup>d</sup>                    | 498.89              | 27.79 | 65.72                        | 34.75           | 11.76                       | 6.24            | 82.04             | 5.28  | ND <sup>e</sup>  |                 | ND <sup>e</sup> |                 |
| <i>T. reesei</i> DSM 769 <sup>d</sup>                      | 502.43              | 24.10 | 69.75                        | 32.04           | 12.49                       | 5.75            | 76.25             | 8.47  | ND <sup>e</sup>  |                 | ND <sup>e</sup> |                 |
| <i>P. chrysogenum</i> DSM 848 <sup>d</sup>                 | 561.97              | 4.72  | 6.56                         | 21.40           | 1.17                        | 3.83            | 76.61             | 5.79  | ND <sup>e</sup>  |                 | ND <sup>e</sup> |                 |
| Initial value <sup>g</sup>                                 | 521.41              | 14.85 | NA <sup>c</sup>              |                 | NA <sup>c</sup>             |                 | 74.89             | 11.81 | NA <sup>c</sup>  |                 | NA <sup>c</sup> |                 |
| <i>S. rugosoannulata</i> DSM 11372 <sup>h</sup>            | 390.85              | 22.53 | 149.02                       | 27.21           | 28.68                       | 5.30            | 42.69             | 5.86  | 32.19            | 13.18           | 42.99           | 18.86           |
| Initial value <sup>i</sup>                                 | 492.33              | 2.60  | NA <sup>c</sup>              |                 | NA <sup>c</sup>             |                 | 70.68             | 3.75  | NA <sup>c</sup>  |                 | NA <sup>c</sup> |                 |
| <i>S. chlorohalonata</i> A-2008-2 (DSM 27588) <sup>h</sup> | 312.12              | 12.23 | 286.51                       | 15.31           | 58.50                       | 3.14            | 55.63             | 1.43  | 15.05            | 4.01            | 21.30           | 5.78            |

<sup>a</sup> Calculated according to Gaussian error propagation rules.

<sup>b</sup> Initial values for *S. commune* and *G. butleri* cultures.

<sup>c</sup> Not applicable.

<sup>d</sup> Values correspond to a cultivation time of 20 days.

<sup>e</sup> Not detectable.

<sup>f</sup> Initial values for *G. trabeum*, *T. reesei*, and *P. chrysogenum* cultures.

<sup>g</sup> Initial values for *S. rugosoannulata* cultures.

<sup>h</sup> Values correspond to a cultivation time of 32 days.

<sup>i</sup> Initial values for *S. chlorohalonata* cultures.

**Table S2.** Total sugars of solids after aqueous extraction, total water-extractable sugars, sums of total sugars, losses of total sugars, fungal biomasses, and increases in fungal biomasses in fungal wheat straw cultures. Means and standard deviations (SD) from triplicate cultures are shown, respectively. Mass losses in the sum of both sugar fractions and fungal biomass increases were calculated as the difference between the corresponding initial and final amount, respectively, and are expressed in terms of absolute (mg) and relative values (i.e. in relation to the corresponding initial amount; for sugar losses only), respectively.

| Fungal strain                                              | Total sugars of solids after aqueous extraction |      | Total water-extractable sugars |     | Sum of total sugars |                 | Loss of total sugars as based on the sum |                 | Loss of total sugars as based on the sum |                 | Fungal biomass |     | Fungal biomass increase |                 |
|------------------------------------------------------------|-------------------------------------------------|------|--------------------------------|-----|---------------------|-----------------|------------------------------------------|-----------------|------------------------------------------|-----------------|----------------|-----|-------------------------|-----------------|
|                                                            | (mg)                                            |      | (mg)                           |     | (mg)                |                 | (mg)                                     |                 | (%)                                      |                 | (mg)           |     | (mg)                    |                 |
|                                                            | Mean                                            | SD   | Mean                           | SD  | Mean                | SD <sup>a</sup> | Mean                                     | SD <sup>a</sup> | Mean                                     | SD <sup>a</sup> | Mean           | SD  | Mean                    | SD <sup>a</sup> |
| Initial value <sup>b</sup>                                 | 481.2                                           | 41.1 | 26.3                           | 2.3 | 507.5               | 41.1            | NA <sup>c</sup>                          |                 | NA <sup>c</sup>                          |                 | 3.1            | 0.6 | NA <sup>c</sup>         |                 |
| <i>S. commune</i> DSM 11223 <sup>d</sup>                   | 387.5                                           | 10.4 | 36.0                           | 2.7 | 423.5               | 10.8            | 84.0                                     | 42.5            | 16.6                                     | 8.5             | 21.1           | 1.4 | 17.9                    | 1.6             |
| <i>G. butleri</i> DSM 2917 <sup>d</sup>                    | 459.8                                           | 28.0 | 11.6                           | 1.1 | 471.4               | 28.1            | 36.1                                     | 49.8            | 7.1                                      | 9.8             | 18.0           | 2.6 | 14.9                    | 2.7             |
| Initial value <sup>e</sup>                                 | 484.1                                           | 17.9 | 16.9                           | 2.1 | 501.0               | 18.0            | NA <sup>c</sup>                          |                 | NA <sup>c</sup>                          |                 | 2.5            | 0.3 | NA <sup>c</sup>         |                 |
| <i>G. trabeum</i> DSM 1398 <sup>d</sup>                    | 410.8                                           | 25.3 | 11.5                           | 1.5 | 422.3               | 25.4            | 78.7                                     | 31.1            | 15.7                                     | 6.2             | 6.0            | 0.9 | 3.5                     | 0.9             |
| <i>T. reesei</i> DSM 769 <sup>d</sup>                      | 412.6                                           | 13.1 | 34.9                           | 0.2 | 447.4               | 13.1            | 53.6                                     | 22.2            | 10.7                                     | 4.5             | 13.6           | 3.3 | 11.1                    | 3.3             |
| <i>P. chrysogenum</i> DSM 848 <sup>d</sup>                 | 475.4                                           | 7.9  | 15.9                           | 1.6 | 491.3               | 8.1             | 9.7                                      | 19.7            | 1.9                                      | 3.9             | 9.9            | 1.1 | 7.5                     | 1.1             |
| Initial value <sup>f</sup>                                 | 444.7                                           | 4.7  | 33.7                           | 5.0 | 478.4               | 6.8             | NA <sup>c</sup>                          |                 | NA <sup>c</sup>                          |                 | 1.8            | 0.3 | NA <sup>c</sup>         |                 |
| <i>S. rugosoannulata</i> DSM 11372 <sup>g</sup>            | 327.9                                           | 20.0 | 18.0                           | 0.6 | 345.9               | 20.0            | 132.5                                    | 21.1            | 27.7                                     | 4.4             | 20.2           | 3.5 | 18.5                    | 3.5             |
| Control <sup>h</sup>                                       | 419.1                                           | 4.9  | 30.1                           | 2.4 | 449.2               | 5.5             | NA <sup>c</sup>                          |                 | NA <sup>c</sup>                          |                 | 2.6            | 0.6 | NA <sup>c</sup>         |                 |
| <i>S. chlorohalonata</i> A-2008-2 (DSM 27588) <sup>g</sup> | 150.5                                           | 13.1 | 29.5                           | 0.1 | 180.0               | 13.1            | 269.2                                    | 14.2            | 59.9                                     | 3.2             | 108.9          | 8.8 | 106.3                   | 8.8             |

<sup>a</sup> Calculated according to Gaussian error propagation rules.

<sup>b</sup> Initial values for *S. commune* and *G. butleri* cultures.

<sup>c</sup> Not applicable.

<sup>d</sup> Values correspond to a cultivation time of 20 days.

<sup>e</sup> Initial values for *G. trabeum*, *T. reesei*, and *P. chrysogenum* cultures.

<sup>f</sup> Initial values for *S. rugosoannulata* cultures.

<sup>g</sup> Values correspond to a cultivation time of 32 days.

<sup>h</sup> Initial values for *S. chlorohalonata* cultures.
